## 1 **Structure of M<sup>pro</sup> from COVID-19 virus and discovery of its inhibitors**

2 Zhenming Jin<sup>1,2,10</sup>, Xiaoyu Du<sup>2,10</sup>, Yechun Xu<sup>3,10</sup>, Yongqiang Deng<sup>4,10</sup>, Meiqin Liu<sup>5,10</sup>, Yao  
3 Zhao<sup>1</sup>, Bing Zhang<sup>1</sup>, Xiaofeng Li<sup>4</sup>, Leike Zhang<sup>5</sup>, Chao Peng<sup>6</sup>, Yinkai Duan<sup>1</sup>, Jing Yu<sup>1</sup>, Lin  
4 Wang<sup>1</sup>, Kailin Yang<sup>7</sup>, Fengjiang Liu<sup>1</sup>, Rendi Jiang<sup>5</sup>, Xinglou Yang<sup>5</sup>, Tian You<sup>1</sup>, Xiaoce Liu<sup>1</sup>,  
5 Xiuna Yang<sup>1</sup>, Fang Bai<sup>1</sup>, Hong Liu<sup>3</sup>, Xiang Liu<sup>8</sup>, Luke W. Guddat<sup>9</sup>, Wenqing Xu<sup>1,6</sup>, Gengfu  
6 Xiao<sup>5</sup>, Chengfeng Qin<sup>4</sup>, Zhengli Shi<sup>5</sup>, Hualiang Jiang<sup>1,3\*</sup>, Zihe Rao<sup>1,2,8\*</sup> & Haitao Yang<sup>1\*</sup>

7 <sup>1</sup>Shanghai Institute for Advanced Immunochemical Studies and School of Life Science and  
8 Technology, ShanghaiTech University, Shanghai, China.

9 <sup>2</sup>Laboratory of Structural Biology, School of Life Sciences and School of Medicine,  
10 Tsinghua University, Beijing, China.

11 <sup>3</sup>Drug Discovery and Design Center, Shanghai Institute of Materia Medica, Chinese  
12 Academy of Sciences, Shanghai, China.

13 <sup>4</sup>Department of Virology, State Key Laboratory of Pathogen and Biosecurity, Beijing  
14 Institute of Microbiology and Epidemiology, Academy of Military Medical Sciences,  
15 Beijing, China.

16 <sup>5</sup>CAS Key Laboratory of Special Pathogens, Wuhan Institute of Virology, Center for  
17 Biosafety Mega-Science, Chinese Academy of Sciences, Wuhan, China.

18 <sup>6</sup>National Facility for Protein Science in Shanghai, Zhangjiang Lab, Shanghai Advanced  
19 Research Institute, Chinese Academy of Science, Shanghai, China.

20 <sup>7</sup>Taussig Cancer Center, Cleveland Clinic, Cleveland, USA.

21 <sup>8</sup>State Key Laboratory of Medicinal Chemical Biology, Frontiers Science Center for Cell  
22 Response, College of Life Sciences, College of Pharmacy, Nankai University, Tianjin,  
23 China.

24 <sup>9</sup>School of Chemistry and Molecular Biosciences, the University of Queensland, Brisbane,  
25 Australia.

26 <sup>10</sup>These authors contributed equally: Zhenming Jin, Xiaoyu Du, Yechun Xu, Yongqiang  
27 Deng, Meiqin Liu.

28 \*e-mail: hljiang@simm.ac.cn; raozh@mail.tsinghua.edu.cn; yanght@shanghaitech.edu.cn

29

30 **SUMMARY**

31 A new coronavirus (CoV) identified as COVID-19 virus is the etiological agent responsible  
32 for the 2019-2020 viral pneumonia outbreak that commenced in Wuhan<sup>1-4</sup>. Currently there  
33 is no targeted therapeutics and effective treatment options remain very limited. In order to  
34 rapidly discover lead compounds for clinical use, we initiated a program of combined  
35 structure-assisted drug design, virtual drug screening and high-throughput screening to  
36 identify new drug leads that target the COVID-19 virus main protease (M<sup>pro</sup>). M<sup>pro</sup> is a key  
37 CoV enzyme, which plays a pivotal role in mediating viral replication and transcription,  
38 making it an attractive drug target for this virus<sup>5,6</sup>. Here, we identified a mechanism-based  
39 inhibitor, N3, by computer-aided drug design and subsequently determined the crystal  
40 structure of COVID-19 virus M<sup>pro</sup> in complex with this compound. Next, through a  
41 combination of structure-based virtual and high-throughput screening, we assayed over  
42 10,000 compounds including approved drugs, drug candidates in clinical trials, and other  
43 pharmacologically active compounds as inhibitors of M<sup>pro</sup>. Six of these inhibit M<sup>pro</sup> with  
44 IC<sub>50</sub> values ranging from 0.67 to 21.4 μM. Ebselen also exhibited strong antiviral activity  
45 in cell-based assays. Our results demonstrate the efficacy of this screening strategy, which  
46 can lead to the rapid discovery of drug leads with clinical potential in response to new  
47 infectious diseases where no specific drugs or vaccines are available.

48

49 CoVs infect humans and other animal species, causing a variety of highly prevalent and  
50 severe diseases, including Severe Acute Respiratory Syndrome (SARS) and Middle East  
51 Respiratory Syndrome (MERS)<sup>7</sup>. The COVID-19 virus genome is comprised of ~30,000  
52 nucleotides; its replicase gene encodes two overlapping polyproteins, pp1a and pp1ab,  
53 required for viral replication and transcription<sup>3,4</sup>. The functional polypeptides are released  
54 from the polyproteins by extensive proteolytic processing, predominantly by a 33.8-kDa  
55 main protease (M<sup>pro</sup>), also referred to as the 3C-like protease. M<sup>pro</sup> digests the polyprotein  
56 at no less than 11 conserved sites, starting with the autolytic cleavage of this enzyme itself  
57 from pp1a and pp1ab<sup>8</sup>. The functional importance of M<sup>pro</sup> in the viral life cycle, together  
58 with the absence of closely related homologues in humans, identify the M<sup>pro</sup> as an attractive  
59 target for antiviral drug design<sup>9</sup>.

60 To facilitate the rapid discovery of antiviral compounds with clinical potential, we  
61 developed a strategy combining structure-assisted drug design, virtual drug screening and  
62 high-throughput screening to repurpose existing drugs to target COVID-19 virus M<sup>pro</sup>.

### 63 **Establishing a high-throughput activity assay**

64 Recombinant COVID-19 virus M<sup>pro</sup> with native N and C termini was expressed in  
65 *Escherichia coli* and subsequently purified (Extended Data Fig. 1a, b). The molecular  
66 weight of COVID-19 virus M<sup>pro</sup> as determined by mass spectroscopy is 33797.0 Da,  
67 consistent with its theoretical molecular weight 33796.8 Da. In order to characterize its  
68 enzymatic activity and to carry out high-throughput screening of inhibitors, we developed  
69 a fluorescence resonance energy transfer (FRET) assay. To do this, a fluorescently labeled  
70 substrate, MCA-AVLQ↓SGFR-Lys(Dnp)-Lys-NH<sub>2</sub>, derived from the N-terminal auto-  
71 cleavage sequence of the viral protease was designed and synthesized for time-dependent

72 kinetic analysis (Extended Data Fig. 1e). The catalytic efficiency ( $k_{cat}/K_m$ ) for COVID-19  
73 virus M<sup>pro</sup> was measured to be 28,500 M<sup>-1</sup>s<sup>-1</sup> which is slightly higher than that for SARS-  
74 CoV M<sup>pro</sup> ( $k_{cat}/K_m=26,500$  M<sup>-1</sup>s<sup>-1</sup>)<sup>10</sup>, but over 30-fold higher than that of human rhinovirus  
75 3C protease ( $k_{cat}/K_m=920$  M<sup>-1</sup>s<sup>-1</sup>)<sup>11</sup>.

### 76 **N3 is a potent irreversible inhibitor of COVID-19 virus M<sup>pro</sup>**

77 In a previous study, we designed a Michael acceptor inhibitor N3 using computer-aided  
78 drug design (CADD) (Extended Data Fig. 1c), which can specifically inhibit multiple CoV  
79 M<sup>pro</sup>s, including those from SARS-CoV and MERS-CoV<sup>12-15</sup>. It also has displayed potent  
80 antiviral activity against infectious bronchitis virus in an animal model<sup>13</sup>. The CC<sub>50</sub> of N3  
81 is >133 μM (Extended Data Fig. 1f). Next, we constructed a homology model for COVID-  
82 19 virus M<sup>pro</sup> and used molecular docking to see if N3 could target this new CoV M<sup>pro</sup>. A  
83 docking pose showed that it could fit inside the substrate-binding pocket. To assess the  
84 efficacy of N3 for COVID-19 virus M<sup>pro</sup>, kinetic analysis was performed. A progress curve  
85 showed that it is a time-dependent irreversible inhibitor of this enzyme. Further, the shape  
86 of this curve supports the mechanism of two-step irreversible inactivation. The inhibitor  
87 first associates with COVID-19 virus M<sup>pro</sup> (EI) with a dissociation constant  $K_i$ ; then, a  
88 stable covalent bond is formed between N3 and M<sup>pro</sup> (E-I). The evaluation of this time-  
89 dependent inhibition requires both the equilibrium-binding constant  $K_i$  (designated as  $k_2/k_1$ )  
90 and the inactivation rate constant for covalent bond formation  $k_3$ . However, N3 exhibits  
91 very potent inhibition of COVID-19 virus M<sup>pro</sup>, such that measurement of  $K_i$  and  $k_3$  proved  
92 not feasible (Extended Data Fig. 1d, e). When very rapid inactivation occurs,  $k_{obs}/[I]$  was  
93 utilized to evaluate the inhibition as an approximation of the pseudo second-order rate  
94 constant ( $k_3/K_i$ )<sup>12</sup>. The value of  $k_{obs}/[I]$  of N3 for COVID-19 virus M<sup>pro</sup> was determined to

95 be  $11,300 \pm 880 \text{ M}^{-1}\text{s}^{-1}$ , suggesting this Michael acceptor has potent inhibition.

### 96 **The crystal structure of COVID-19 virus M<sup>pro</sup> in complex with N3**

97 In order to elucidate the inhibitory mechanism of this compound, we determined the crystal  
98 structure of COVID-19 virus M<sup>pro</sup> in complex with N3 to 2.1-Å resolution. The asymmetric  
99 unit contains only one polypeptide (Extended Data Table 1). However, two of these  
100 associate to form a dimer by a crystallographic 2-fold symmetry axis (the two molecules  
101 are designated protomer A and B) (Fig. 1b). All residues (residues 1–306) are visible in  
102 electron density maps. Each protomer is composed of three domains (Fig. 1a). Domains I  
103 (residues 8–101) and II (residues 102–184) have an antiparallel β-barrel structure. Domain  
104 III (residues 201–303) contains five α-helices arranged into a largely antiparallel globular  
105 cluster, and is connected to domain II by means of a long loop region (residues 185–200).  
106 COVID-19 virus M<sup>pro</sup> has a Cys–His catalytic dyad, and the substrate-binding site is  
107 located in a cleft between Domain I and II. These features are similar to those of other M<sup>pro</sup>s  
108 reported previously<sup>5,6,13-15</sup>. The electron density map shows that N3 binds in the substrate-  
109 binding pocket in an extended conformation (Fig. 1c, Extended Data Fig. 2), with the  
110 inhibitor backbone atoms forming an antiparallel sheet with residues 164–168 of the long  
111 strand<sub>155-168</sub> on one side, and with residues 189–191 of the loop linking domains II and III.

112 Here we detail the specific interactions of N3 with M<sup>pro</sup> (Fig. 1c, d). The electron density  
113 shows that the S<sub>γ</sub> atom of C145-A forms a covalent bond (1.8-Å) with the C<sub>β</sub> of the vinyl  
114 group, confirming that the Michael addition has occurred. The S1 subsite has an absolute  
115 requirement for Gln at the P1 position. The side chains of F140-A, N142-A, E166-A, H163-  
116 A, H172-A, S1-B (from protomer B), and main chains of F140-A and L141-A are involved  
117 in S1 subsite formation, which also includes two ordered water molecules (named W1 and

118 W2). The lactam at P1 inserts into the S1 subsite and forms a hydrogen bond with H163-  
119 A. The side chain of Leu at P2 site inserts deeply into the hydrophobic S2 subsite, which  
120 consists of the side chains of H41-A, M49-A, Y54-A, M165-A, and the alkyl portion of the  
121 side chain of D187-A. The side chain of Val at P3 is solvent-exposed, indicating that this  
122 site can tolerate a wide range of functional groups. The side chain of Ala at P4 side is  
123 surrounded by the side chains of M165-A, L167-A, F185-A, Q192-A and the main chain  
124 of Q189-A, all of which form a small hydrophobic pocket. P5 makes van der Waals contacts  
125 with P168-A and the backbone of residues 190–191. The bulky benzyl group extends into  
126 the S1' site, forming van der Waals interactions with T24-A and T25-A. In addition, N3  
127 forms multiple hydrogen bonds with the main chain of the residues in the substrate-binding  
128 pocket, which also helps lock the inhibitor inside the substrate-binding pocket.

129 An overlay of the structures of COVID-19 virus M<sup>pro</sup>-N3 and SARS-CoV M<sup>pro</sup>-N1<sup>12</sup>  
130 shows that N3 and N1 bind to M<sup>pro</sup>s in a similar mode (Fig. 2a, Extended Data Fig. 3). The  
131 major difference lies in the P1' site. Compared with the benzyl ester portion of N3 in the  
132 COVID-19 virus M<sup>pro</sup> structure, the ethyl ester portion in N1 adopts a slightly different  
133 conformation. This may be attributed to an ordered water (W1) in SARS-CoV M<sup>pro</sup>-N1  
134 structure, which makes a long distance hydrogen bond to the carboxylate oxygen of the  
135 ester and also forms two hydrogen bonds from the backbone NH of G143 and the side  
136 chain of N142. In our previous study, we proposed that all the CoV M<sup>pro</sup>s share a highly  
137 conserved substrate-recognition pocket, which could serve as a drug target for the design  
138 of broad-spectrum inhibitors<sup>12</sup>. The recent discovery of new CoVs and accumulation of  
139 structural data for CoV M<sup>pro</sup>s from various species provided the opportunity to further  
140 examine this hypothesis. Superposition of the 12 crystal structures of M<sup>pro</sup>s<sup>12-21</sup> have shown

141 that the most variable regions were the helical domain III and surface loops, but the  
142 substrate-binding pockets located in a cleft between domains I and II are still highly  
143 conserved among all CoV M<sup>pro</sup>s, suggesting the antiviral inhibitors targeting this site should  
144 have wide-spectrum anti-CoV activity (Fig. 2b, c).

#### 145 **Virtual screening**

146 The structure of COVID-19 virus M<sup>pro</sup> in complex with N3 provides a model for identifying  
147 lead inhibitors to target COVID-19 virus M<sup>pro</sup> through *in silico* screening. To achieve this,  
148 an in-house database of potential binding compounds was docked using Glide (v8.2). The  
149 results show that cinanserin fits snugly into the substrate-binding pocket, by interacting  
150 with H41 and E166 of M<sup>pro</sup> by cation- $\pi$ . Subsequently we determined this compound has  
151 an IC<sub>50</sub> value of 125  $\mu$ M for M<sup>pro</sup>. Moreover, cinanserin is a well-characterized serotonin  
152 antagonist, which underwent preliminary clinical testing in humans in the 1960s<sup>22</sup> and has  
153 previously been shown to inhibit SARS-CoV M<sup>pro</sup><sup>23</sup>. The CC<sub>50</sub> of cinanserin is > 200  $\mu$ M  
154 (Extended Data Fig. 4). Thus, it has potential for optimization as an anti-viral drug lead.

#### 155 **High-throughput screening**

156 Next, we used our FRET assay, to screen a library of ~10,000 compounds consisting of  
157 approved drugs, clinical trial drug candidates and natural products. Primary hits included  
158 seven compounds that are either FDA-approved drugs or clinical trial/preclinical drug  
159 candidates. We then determined their IC<sub>50</sub> values, which are in the range from 0.67 to 21.4  
160  $\mu$ M (Fig. 3). Amongst them, disulfiram and carmofur are FDA-approved drugs, whilst  
161 ebselen, shikonin, tideglusib, PX-12 and TDZD-8 are currently in clinical trials or  
162 preclinical studies. Ebselen has the strongest inhibition of M<sup>pro</sup> activity with an IC<sub>50</sub> of 0.67  
163  $\mu$ M. However, in a detergent-based assay<sup>24</sup>, TDZD-8 was found to be an aggregate-based

164 inhibitor, which might non-specifically inhibit M<sup>pro</sup> (Extended Data Fig. 5) and was  
165 therefore not considered for further investigation. Since our structural data is based on N3,  
166 we investigated if molecular docking could predict how other six inhibitors bind to this  
167 protein. In all cases, reasonable docking poses were found, demonstrating that they could  
168 fit inside the substrate-binding pocket (Extended Data Fig. 6). Next, we set out to identify  
169 the potential covalent inhibitors among these compounds through tandem MS/MS analysis.  
170 The MS/MS data shows that ebselen, PX-12 and carmofur are all able to covalently bind  
171 to C145 of the catalytic dyad in COVID-19 virus M<sup>pro</sup>. However, while PX-12 and  
172 carmofur completely modified M<sup>pro</sup>, ebselen could only partially modify this viral cysteine  
173 protease (Extended Data Fig. 7). Since ebselen has even stronger inhibition than the others,  
174 there is a possibility that ebselen could also inhibit M<sup>pro</sup> through non-covalent binding.

#### 175 **Antiviral activity assay**

176 To further substantiate the enzymatic inhibition results *in vitro*, we evaluated whether these  
177 compounds could prevent viral replication in cell-based assays. As shown in Fig. 4a,  
178 quantitative real-time RT-PCR (qRT-PCR) demonstrated that ebselen and N3 showed the  
179 strongest antiviral effects among them at a concentration of 10  $\mu$ M treatment in COVID-  
180 19 virus infected Vero cells. A plaque-reduction assay was performed to further assess the  
181 efficacy of these two compounds in protecting cells. Ebselen and N3 displayed inhibition  
182 against COVID-19 virus with individual EC<sub>50</sub> values of 4.67  $\mu$ M and 16.77  $\mu$ M,  
183 respectively (Fig. 4b, c). The dose-response curves suggest that both of them could be able  
184 to penetrate cellular membrane to access their targets. Ebselen is an organoselenium  
185 compound with anti-inflammatory, anti-oxidant and cytoprotective properties. This  
186 compound has been investigated for the treatment of multiple diseases, such as bipolar



187 disorders<sup>25</sup> and hearing loss<sup>26,27</sup>. Ebselen has extremely low cytotoxicity (LD<sub>50</sub> in rats >  
188 4,600 mg/kg, per os)<sup>28</sup> and its safety in humans has been evaluated in a number of clinical  
189 trials<sup>26,27,29</sup>. These data strongly suggest the clinical potential of ebselen for CoV treatment.  
190 It is also interesting that cinanserin displayed moderate inhibition against COVID-19 virus  
191 with an EC<sub>50</sub> value of 20.61 μM from qRT-PCR analysis (Extended Data Fig. 4), which is  
192 superior to that in the enzymatic inhibition assay, suggesting that cinanserin might have  
193 multi-drug targets in preventing viral infection. In further studies, selection and  
194 characterization of drug-resistant mutants will help clarify the mode of cinanserin's action.

## 195 **Discussion**

196 Our crystal structural and docking data have shown that the drug leads identified can bind  
197 to the substrate-binding pocket of COVID-19 virus M<sup>Pro</sup>, which is highly conserved among  
198 all CoV M<sup>Pro</sup>s. This strongly supports our hypothesis that development of a single antiviral  
199 agent targeting M<sup>Pro</sup> or in combination with other potential therapies could provide an  
200 effective first line of defense against all CoV-associated diseases.

201 In the last twenty years, new infectious agents have emerged to cause epidemics, such  
202 as SARS and MERS<sup>7</sup>. The timely development of effective antiviral agents for clinical use  
203 is extremely challenging because conventional drug development approaches normally  
204 take years of investigations and cost billions of dollars. The repurposing of approved  
205 pharmaceutical drugs and drug candidates provides an alternative approach to rapidly  
206 identify potential drug leads to manage rapidly emerging viral infections. Cell-based  
207 phenotypic screening has proven to be valuable<sup>30</sup>, but the complexity of this approach is  
208 not readily compatible with high-throughput pipelines, and it cannot identify the molecular  
209 target or mechanism of action<sup>31</sup>. In this study, the convergence of structure-based *ab initio*

210 drug design, virtual screening and high-throughput screening proved to be an efficient  
211 strategy to find antiviral leads against COVID-19 virus. The methods presented here can  
212 greatly assist in the rapid discovery of drug leads with clinical potential in response to new  
213 emerging infectious diseases that currently lack specific drugs and vaccines.

## 214 References

- 215 1 Zhu, N. *et al.* A novel coronavirus from patients with pneumonia in China, 2019. *New England*  
216 *Journal of Medicine* (2020).
- 217 2 Qun Li *et al.* Early Transmission Dynamics in Wuhan, China, of Novel Coronavirus-Infected  
218 Pneumonia. *New England Journal of Medicine* (2020).
- 219 3 Zhou, P. *et al.* A pneumonia outbreak associated with a new coronavirus of probable bat origin.  
220 *Nature*, doi:10.1038/s41586-020-2012-7 (2020).
- 221 4 Wu, F. *et al.* A new coronavirus associated with human respiratory disease in China. *Nature*,  
222 doi:10.1038/s41586-020-2008-3 (2020).
- 223 5 Anand, K. *et al.* Structure of coronavirus main proteinase reveals combination of a chymotrypsin  
224 fold with an extra  $\alpha$ -helical domain. *The EMBO Journal* **21**, 3213-3224 (2002).
- 225 6 Yang, H. T. *et al.* The crystal structures of severe acute respiratory syndrome virus main protease  
226 and its complex with an inhibitor. *Proceedings of the National Academy of Sciences of the United*  
227 *States of America* **100**, 13190-13195, doi:10.1073/pnas.1835675100 (2003).
- 228 7 de Wit, E., van Doremalen, N., Falzarano, D. & Munster, V. J. SARS and MERS: recent insights  
229 into emerging coronaviruses. *Nature Reviews Microbiology* **14**, 523-534,  
230 doi:10.1038/nrmicro.2016.81 (2016).
- 231 8 Hegyi, A. & Ziebuhr, J. Conservation of substrate specificities among coronavirus main proteases.  
232 *Journal of general virology* **83**, 595-599 (2002).
- 233 9 Pillaiyar, T., Manickam, M., Namasivayam, V., Hayashi, Y. & Jung, S. H. An Overview of Severe  
234 Acute Respiratory Syndrome-Coronavirus (SARS-CoV) 3CL Protease Inhibitors: Peptidomimetics  
235 and Small Molecule Chemotherapy. *Journal of Medicinal Chemistry* **59**, 6595-6628,  
236 doi:10.1021/acs.jmedchem.5b01461 (2016).
- 237 10 Xue, X. Y. *et al.* Production of authentic SARS-CoV M-pro with enhanced activity: Application as  
238 a novel tag-cleavage endopeptidase for protein overproduction. *Journal of Molecular Biology* **366**,  
239 965-975, doi:10.1016/j.jmb.2006.11.073 (2007).
- 240 11 Wang, Q. M., Johnson, R. B., Cox, G. A., Villarreal, E. C. & Loncharich, R. J. A Continuous  
241 Colorimetric Assay for Rhinovirus-14 3C Protease Using Peptidep-Nitroanilides as Substrates.  
242 *Analytical biochemistry* **252**, 238-245 (1997).
- 243 12 Yang, H. T. *et al.* Design of wide-spectrum inhibitors targeting coronavirus main proteases. *Plos*  
244 *Biology* **3**, 2044-2044, doi:10.1371/journal.pbio.0030428 (2005).
- 245 13 Xue, X. Y. *et al.* Structures of two coronavirus main proteases: Implications for substrate binding  
246 and antiviral drug design. *Journal of Virology* **82**, 2515-2527, doi:10.1128/jvi.02114-07 (2008).
- 247 14 Ren, Z. L. *et al.* The newly emerged SARS-Like coronavirus HCoV-EMC also has an "Achilles'  
248 heel": current effective inhibitor targeting a 3C-like protease. *Protein & Cell* **4**, 248-250,  
249 doi:10.1007/s13238-013-2841-3 (2013).
- 250 15 Wang, F., Chen, C., Tan, W., Yang, K. & Yang, H. Structure of Main Protease from Human  
251 Coronavirus NL63: Insights for Wide Spectrum Anti-Coronavirus Drug Design. *Sci Rep* **6**, 22677-  
252 22677, doi:10.1038/srep22677 (2016).
- 253 16 Zhao, Q. *et al.* Structure of the main protease from a global infectious human coronavirus, HCoV-  
254 HKU1. *Journal of virology* **82**, 8647-8655, doi:10.1128/JVI.00298-08 (2008).
- 255 17 Lee, C.-C. *et al.* Structural basis of inhibition specificities of 3C and 3C-like proteases by zinc-  
256 coordinating and peptidomimetic compounds. *J Biol Chem* **284**, 7646-7655,  
257 doi:10.1074/jbc.M807947200 (2009).
- 258 18 Ma, Q., Xiao, Y., Hilgenfeld, R. *Inhibitor for the Main Protease of Coronavirus Hku4* (2012).
- 259 19 Wang, F. H. *et al.* Crystal Structure of Feline Infectious Peritonitis Virus Main Protease in Complex

- 260 with Synergetic Dual Inhibitors. *Journal of Virology* **90**, 1910-1917, doi:10.1128/jvi.02685-15  
261 (2016).
- 262 20 Wang, F. H. *et al.* Michael Acceptor-Based Peptidomimetic Inhibitor of Main Protease from Porcine  
263 Epidemic Diarrhea Virus. *Journal of Medicinal Chemistry* **60**, 3212-3216,  
264 doi:10.1021/acs.jmedchem.7b00103 (2017).
- 265 21 Cui, W. *et al.* The crystal structure of main protease from mouse hepatitis virus A59 in complex with  
266 an inhibitor. *Biochemical and Biophysical Research Communications* **511**, 794-799,  
267 doi:10.1016/j.bbrc.2019.02.105 (2019).
- 268 22 Rubin, B. & Waugh, M. H. Antiphlogistic effects of antisero-tonin (SQ 10,643) and aminopyrine in  
269 rats versus endotoxin and other agents. *Proceedings of the Society for Experimental Biology and*  
270 *Medicine* **119**, 438-443 (1965).
- 271 23 Chen, L. *et al.* Cinanserin is an inhibitor of the 3C-like proteinase of severe acute respiratory  
272 syndrome coronavirus and strongly reduces virus replication in vitro. *Journal of virology* **79**, 7095-  
273 7103 (2005).
- 274 24 Feng, B. Y. & Shoichet, B. K. A detergent-based assay for the detection of promiscuous inhibitors.  
275 *Nature protocols* **1**, 550-553 (2006).
- 276 25 Singh, N. *et al.* A safe lithium mimetic for bipolar disorder. *Nature communications* **4**, 1-7 (2013).
- 277 26 Lynch, E. & Kil, J. Development of ebselen, a glutathione peroxidase mimic, for the prevention and  
278 treatment of noise-induced hearing loss. *Seminars in Hearing* **30**, 047-055 (2009).
- 279 27 Kil, J. *et al.* Safety and efficacy of ebselen for the prevention of noise-induced hearing loss: a  
280 randomised, double-blind, placebo-controlled, phase 2 trial. *The Lancet* **390**, 969-979 (2017).
- 281 28 Renson, M., Etschenberg, E. & Winkelmann, J. 2-Phenyl-1, 2-benzisoselenazol-3 (2H)-one  
282 containing pharmaceutical preparations and process for the treatment of rheumatic diseases. (1982).
- 283 29 Masaki, C. *et al.* Effects of the potential lithium-mimetic, ebselen, on impulsivity and emotional  
284 processing. *Psychopharmacology* **233**, 2655-2661 (2016).
- 285 30 Xu, M. *et al.* Identification of small-molecule inhibitors of Zika virus infection and induced neural  
286 cell death via a drug repurposing screen. *Nature Medicine* **22**, 1101-1107, doi:10.1038/nm.4184  
287 (2016).
- 288 31 Aulner, N., Danckaert, A., Ihm, J., Shum, D. & Shorte, S. L. Next-Generation Phenotypic Screening  
289 in Early Drug Discovery for Infectious Diseases. *Trends in parasitology* (2019).
- 290

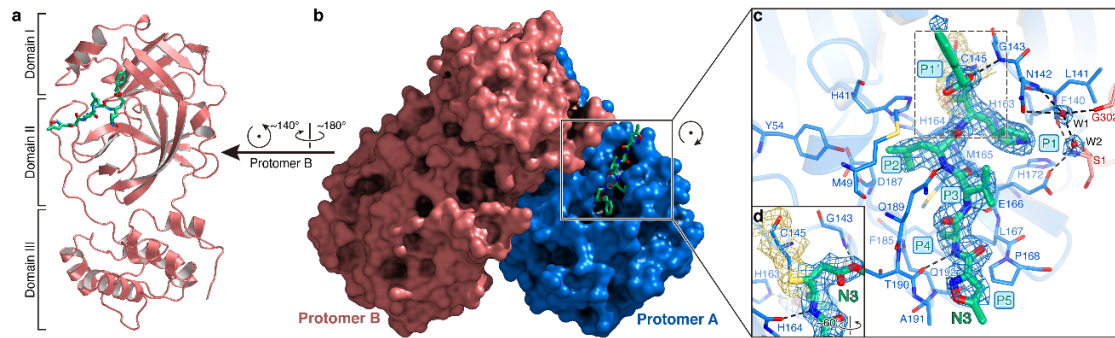

291

292 **Fig. 1 | The crystal structure of COVID-19 virus M<sup>pro</sup> in complex with N3.** **a**, Cartoon  
293 representation of one protomer of the dimeric M<sup>pro</sup>-inhibitor complex. **b**, Surface  
294 representation of the homodimer of M<sup>pro</sup>. Protomer A is in blue, protomer B is in salmon, N3 is presented as green  
295 sticks. **c**, A zoomed view of the substrate-binding pocket. The key residues forming the binding  
296 pocket are shown in sticks, the two waters, assigned as W1 and W2, are shown as red spheres. P1,  
297 P1', P2, P3, P4 and P5 sites of N3 are indicated. Hydrogen bonds that help to lock the inhibitor are  
298 shown in black dashed lines. The  $2F_o - F_c$  density map contoured at  $1.2 \sigma$  is shown around N3  
299 molecule (blue mesh), C145-A (yellow mesh), and the two waters (blue mesh). **d**, The C-S covalent  
300 bond.

301

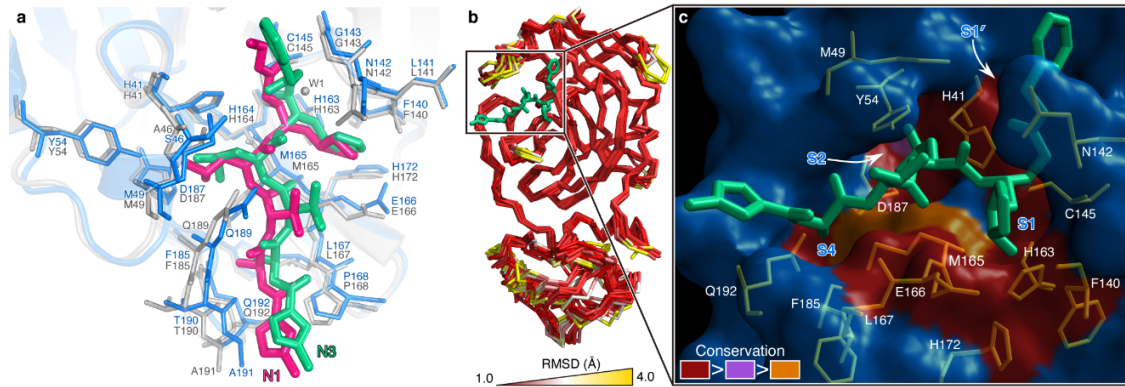

302

303 **Fig. 2 | The substrate-binding pockets of CoV M<sup>pro</sup>s across different species.** **a**, Comparison of  
304 inhibitor binding mode between the structures of COVID-19 virus M<sup>pro</sup>-N3 and SARS-CoV M<sup>pro</sup>-  
305 N1. COVID-19 virus M<sup>pro</sup> is shown in marine cartoon; SARS-CoV M<sup>pro</sup> in grey; N3 in green sticks;  
306 N1 in hot pink. **b**, Superposition of crystal structures of M<sup>pro</sup>s (C $\alpha$  1-300) from 12 CoVs, including  
307 COVID-19 virus, SARS-CoV, MERS-CoV, HCoV-HKU1, BtCoV-HKU4, MHV-A59, PEDV, FIPV,  
308 TGEV, HCoV-NL63, HCoV-229E and IBV. The color spectrum represents the root-mean-square  
309 deviation (RMSD) of the aligned C $\alpha$  atoms. **c**, Surface presentation of conserved substrate-binding  
310 pockets of 12 CoV M<sup>pro</sup>s. Red: residues are entirely identical among all 12 M<sup>pro</sup>s; violet: conserved  
311 substitution in one CoV M<sup>pro</sup>; orange: conserved substitution in more than one CoV M<sup>pro</sup>s. S1, S2, S4,  
312 and S1' subsites are indicated.

313

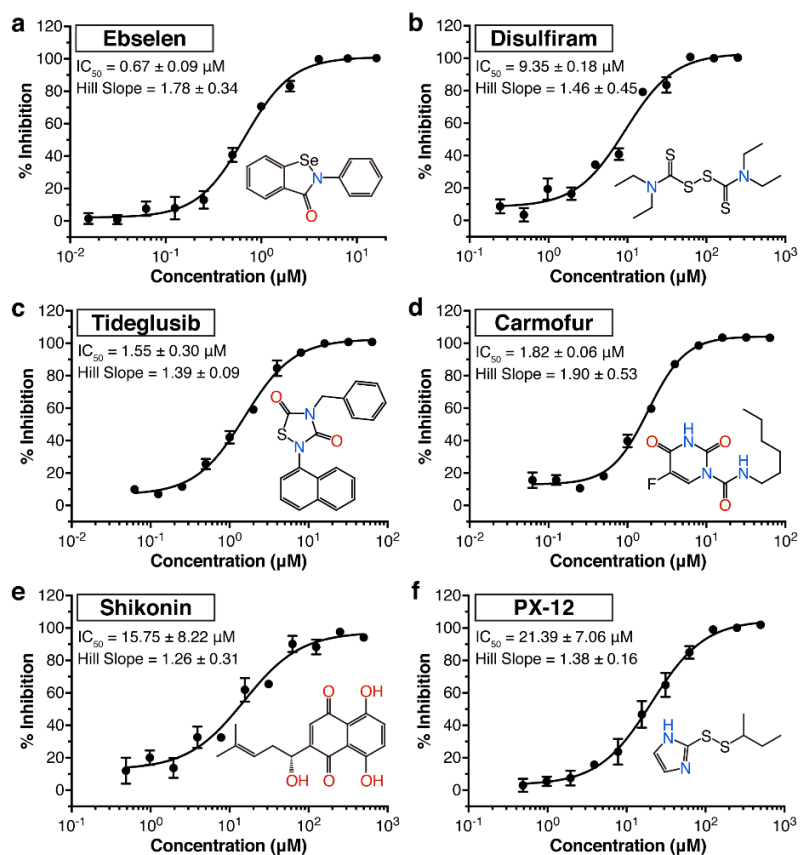

314

315 **Fig. 3 | Drug leads inhibit the activity of COVID-19 virus  $M^{pro}$ .** a-f, The hydrolytic activity of  
316 COVID-19 virus  $M^{pro}$  was measured in the presence of varying concentrations of the drug  
317 candidates. Dose-response curves for half-maximum inhibitory concentration ( $IC_{50}$ ) values were  
318 determined by nonlinear regression. All data are shown as mean  $\pm$  s.e.m.,  $n = 3$  technical replicates.  
319

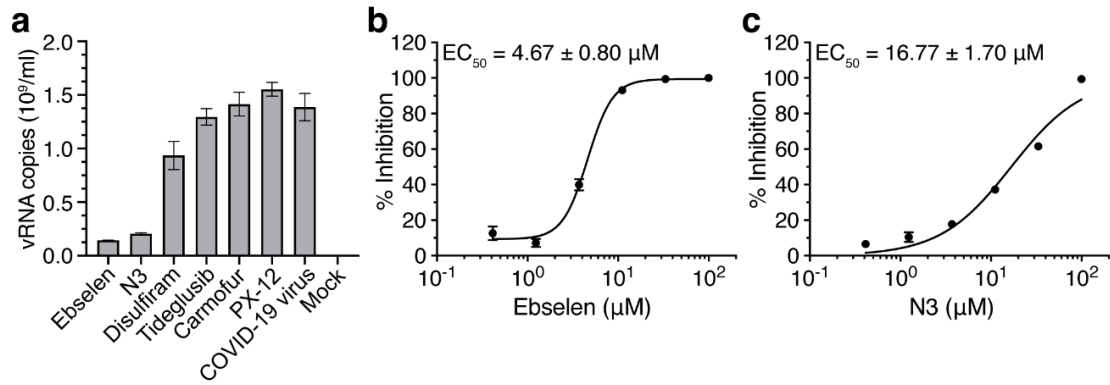

320

321 **Fig. 4 | Antiviral activities of the drug leads against COVID-19 virus.** **a**, The quantification of  
322 absolute viral RNA copies (per ml) in the supernatant at 72 h post infection (p.i.) determined by  
323 qRT-PCR analysis. Data are mean ± s.e.m.,  $n = 3$  technical replicates. **b**, **c**, Dose-response curves  
324 for ebselen and N3 in the plaque-reduction assay, respectively. All data are shown as mean  
325 ± s.e.m.,  $n = 4$  technical replicates.

326

327 **Methods**

328 **Cloning, protein expression and purification of COVID-19 virus M<sup>pro</sup>**

329 The full-length gene encoding COVID-19 virus M<sup>pro</sup> was optimized and synthesized for  
330 *Escherichia coli* expression (Genewiz, USA). Cloning strategy for producing authentic  
331 viral M<sup>pro</sup> has been reported previously<sup>10</sup>. The expression plasmid was transformed into  
332 *Escherichia coli* BL21 (DE3) cells and then cultured in LB medium containing 100 µg/ml  
333 ampicillin at 37 °C. When the cells were grown to OD<sub>600</sub> of 0.6-0.8, 0.5 mM IPTG was  
334 added to the cell culture to induce the expression at 16 °C. After 10 h, the cells were  
335 harvested by centrifugation at 3,000g. The cell pellets were resuspended in lysis buffer (20  
336 mM Tris-HCl pH 8.0, 300 mM NaCl), lysed by high-pressure homogenization, and then  
337 centrifuged at 25,000g for 40 min. The supernatant was loaded onto Ni-NTA affinity  
338 column (Qiagen, Germany), and washed by the resuspension buffer containing 20 mM  
339 imidazole. The His tagged M<sup>pro</sup> was eluted by cleavage buffer (50 mM Tris-HCl pH 7.0,  
340 150 mM NaCl) including 300 mM imidazole. Human rhinovirus 3C protease was added to  
341 remove the C-terminal His tag. The M<sup>pro</sup> was further purified by ion exchange  
342 chromatography and size exclusion chromatography. CoV M<sup>pro</sup>s exist as a mixture of  
343 monomers and dimers in solutions<sup>32</sup>. The purified M<sup>pro</sup> was stored in 50 mM Tris-HCl pH  
344 7.3, 1 mM EDTA.

345 **Crystallization, data collection and structure determination**

346 COVID-19 virus M<sup>pro</sup> was incubated with 10 mM N3 for 30 min and the complex (5 mg/ml)  
347 was crystallized by hanging drop vapor diffusion method at 20 °C. The best crystals were  
348 grown with well buffer containing 0.1 M MES pH 6.0, 2% polyethylene glycol (PEG) 6000,  
349 3% DMSO, 1 mM DTT. The cryo-protectant solution contained 0.1 M MES pH 6.0, 30%



350 PEG 400.

351 X-ray data were collected on beamline BL17U1 at Shanghai Synchrotron Radiation  
352 Facility (SSRF) at 100 K and at a wavelength of 1.07180 Å using an Eiger X 16M image  
353 plate detector. Data integration and scaling were performed using the program Xia2<sup>33</sup>. The  
354 structure was determined by molecular replacement (MR) with the Phaser module<sup>34</sup> in  
355 CCP4<sup>35</sup> using the SARS-CoV M<sup>pro</sup> (PDB ID: 2H2Z) as a search template. The output model  
356 from MR was subsequently subjected to iterative cycles of manual model adjustment with  
357 Coot<sup>36</sup> and refinement was finished with Phenix<sup>37</sup>. The inhibitor N3 was built according to  
358 the omit map. The phasing and refinement statistics are summarized in Extended Data  
359 Table 1. The  $R_{work}/R_{free}$  values are 0.202/0.235, respectively. 97.3% residues are in most  
360 favored regions of the Ramachandran plot, and no residues are found in disallowed regions.  
361 Coordinates and structure factors for COVID-19 virus M<sup>pro</sup> in complex with the inhibitor  
362 N3 have been deposited in Protein Data Bank (PDB) with accession number 6LU7.

### 363 **Enzymatic activity and inhibition assays**

364 The enzyme activity assays have been described previously<sup>10</sup>. Briefly, the activity of  
365 COVID-19 virus M<sup>pro</sup> was measured by a continuous kinetic assay, with the substrate  
366 MCA-AVLQSGFR-Lys(Dnp)-Lys-NH<sub>2</sub> (GL Biochem, Shanghai), using wavelengths of  
367 320 nm and 405 nm for excitation and emission, respectively. The assay started by  
368 immediately mixing 0.2 μM COVID-19 virus M<sup>pro</sup> with different concentrations of  
369 substrate (2.5-100 μM). Fluorescence intensity was monitored with an EnVision multimode  
370 plate reader (Perkin Elmer, USA). Initial rates were obtained by fitting the linear portion  
371 of the curves to a straight line. The kinetic parameters  $K_m$  and  $k_{cat}$  were calculated from a  
372 double-reciprocal plot. As N3 is a mechanism-based irreversible inhibitor for COVID-19

373 virus  $M^{pro}$ ,  $k_{obs}/[I]$  was used as an approximation of the pseudo second-order rate constant  
374 to evaluate the inhibition effect of the inhibitor N3<sup>12</sup>. In this case, the measurement was  
375 carried out with 0.2  $\mu$ M of enzyme, 20  $\mu$ M of substrate and inhibitor at 6 different  
376 concentrations (0-1  $\mu$ M).

### 377 **Virtual screening**

378 The virtual screening was performed using our in-house database via a workflow  
379 application of Glide (v8.2), Maestro (Schrodinger 2019-1a)<sup>38</sup>. All compounds in the  
380 database were considered to be at pH  $7.4 \pm 0.2$  to estimate their protonation state using the  
381 program EpiK<sup>39</sup>. Their three dimensional conformations were generated by the ligPrep  
382 module of Maestro. The structure of COVID-19 virus  $M^{pro}$  (PDB ID: 6LU7) was used to  
383 generate receptor grid for docking simulations. The center of active site of the grid was  
384 determined according to the position of N3 in the structure. The flexibility of the receptor  
385 hydroxyl and thiol groups in side chains of C145, S46 and Y54 were considered. At the  
386 very beginning, a relatively fast but raw screening was performed by using the glide  
387 standard precision model, and the top 20% of compounds were kept. Then covalent  
388 docking simulations were performed by choosing Michael Addition as the reaction type for  
389 these top 20% compounds that contained Michael acceptors, and C145 was set as the  
390 source of Michael donor. Finally, the candidate molecules were picked by analysing the  
391 predicted binding modes and their scores.

### 392 **High-throughput drug screen and IC<sub>50</sub> measurement**

393 Potential inhibitors against COVID-19 virus  $M^{pro}$  were screened by an enzymatic inhibition  
394 assay. When the different compounds were added into the enzymatic reaction mixture, the  
395 change of initial rates was calculated to evaluate their inhibitory effect. Five drug libraries,

396 Approved Drug Library (Target Mol, USA), Clinic Compound Library (Target Mol, USA),  
397 FDA-approved Drug Library (Selleck, USA), Natural Product Library (Selleck, USA), and  
398 Anti-virus Drug Library (Shanghai Institute for Advanced Immunochemical Studies,  
399 SIAIS), which includes ~10,000 compounds, were used. The preliminary screening  
400 reaction mixture included 0.2  $\mu\text{M}$  protein, 20  $\mu\text{M}$  substrate and 50  $\mu\text{M}$  compounds. The  
401 compounds of interest were defined as those with a percentage of inhibition over 60%  
402 compared with the reaction in the absence of inhibitor.  $\text{IC}_{50}$  values of seven drug leads were  
403 measured using 0.2  $\mu\text{M}$  protein, 20  $\mu\text{M}$  substrate and 11 different inhibitor concentrations.  
404 In order to exclude inhibitors possibly acting as aggregators, detergent-based control was  
405 performed by adding 0.001% or 0.01% freshly made up Triton X-100 to the reaction at the  
406 same time<sup>24</sup>. All experimental data was analyzed using GraphPad Prism. All experiments  
407 were performed in triplicate.

#### 408 **Molecular docking**

409 To understand the binding interaction of these molecules with COVID-19 virus  $\text{M}^{\text{pro}}$ , two  
410 different molecular docking methods, i.e., Glide (v8.2)<sup>38</sup> and iFitDock<sup>40</sup> were used to  
411 predict their binding poses. Then a 3D molecular similarity calculation method, SHAFTS<sup>41</sup>,  
412 was used for molecular alignment poses enumeration by matching the critical  
413 pharmacophore and volumetric overlay between the N3 molecule within the  $\text{M}^{\text{pro}}$  structure  
414 and the six drug candidates. However, the selenium atom of ebselen could not be treated  
415 by any of these above methods, so sulfur was used to replace it in the calculations. Then  
416 the obtained optimal superposition of these molecules was used to assess the reasonability  
417 of the predicted binding poses from the two docking methods, and only the binding  
418 orientations which were consistent among different methods were kept for constructing the

419 initial complexes. Finally, these complexes were further optimized and re-scored by using  
420 MM-GBSA module<sup>42</sup> of Schrödinger, and the residues within 5 Å around the ligand were  
421 refined.

#### 422 **Antiviral and cytotoxicity assays for compounds from high-throughput screening**

423 The *in vitro* antiviral efficacy of the drug candidates on Vero cells were determined by qRT-  
424 PCR. About  $1 \times 10^4$  Vero cells were seeded into a 96-well plate and incubated for 20-24 h  
425 at 37 °C. All the infection experiments were performed at biosafety level-3 (BSL-3). Cells  
426 were pre-treated with the drug candidates (10 µM) for 1 h, the COVID-19 virus (MOI of  
427 0.01) was subsequently added to allow infection for 2 h. Then, the virus-drug mixture was  
428 removed and cells were further cultured with fresh drug-containing medium. At 72 h post  
429 infection (p.i.), viral RNA (vRNA) was extracted from the culture supernatant using  
430 QIAamp viral RNA mini kit (Qiagen, Germany) according to the manufacturer's  
431 recommendation and detected by qRT-PCR assay using the COVID-19 virus-specific  
432 primers. Because shikonin showed cellular toxicity at the test concentration, its antiviral  
433 activity assay did not further proceed. Viral RNA copies per milliliter were determined  
434 using a synthetic RNA fragment to amplify the target region. The linearized plasmid  
435 containing S gene of COVID-19 virus was subjected to *in vitro* transcription. The resulting  
436 RNA transcripts were purified and then quantified using spectrophotometry on Nanodrop  
437 2000 (Thermo Fisher Scientific, USA). The purified RNA was diluted 10-fold serially  
438 using RNase-free water and was detected using qRT-PCR. Threshold cycle (Ct) values for  
439 the known concentrations of the RNA were plotted against the log of the number of genome  
440 equivalent copies. The resultant standard curve was used to determine the number of  
441 genome equivalents of vRNA in the samples. The determination of the detection limit was

442 based on the lowest level at which vRNA was detected and remained within the range of  
443 linearity of a standard curve (Ct value of 38). TaqMan primers for COVID-19 virus are 5'-  
444 TCCTGGTGATTCTTCTTCAGG-3' and 5'-TCTGAGAGAGGGTCAAGTGC-3' with  
445 COVID-19 virus probe 5'-FAM-AGCTGCAGCACCAGCTGTCCA-BHQ1-3'. The  
446 cytotoxicity of the tested drugs on Vero cell were determined by MTS cell proliferation  
447 assays (Promega, USA).  $1 \times 10^4$  cells were seeded into a 96-well plate and incubated for 20-  
448 24 h at 37 °C. After that, the medium was removed, and 100  $\mu$ l of medium containing  
449 decreasing concentrations of antiviral compounds were added to the wells. After 4 days  
450 incubation at 37 °C, MTS assays were performed according to manufacturer's protocols.  
451 All experiments were performed in triplicate.

#### 452 **Antiviral and cytotoxicity assays for cinanserin**

453 For the antiviral assay, a clinical isolate COVID-19 virus<sup>3</sup> was propagated in Vero E6 cells,  
454 and viral titer was determined as described previously<sup>43</sup>. All the infection experiments were  
455 performed at biosafety level-3 (BSL-3). Pre-seeded Vero E6 cells ( $5 \times 10^4$  cells/well) were  
456 pre-treated with the different concentration of cinanserin for 1 h and the virus was  
457 subsequently added (MOI of 0.05) to allow infection for 2 h. Then, the virus-drug mixture  
458 was removed and cells were further cultured with fresh drug containing medium. At 24 h  
459 p.i., the cell supernatant was collected and vRNA in supernatant was subjected to qRT-PCR  
460 analysis. For cytotoxicity assays, Vero E6 cells were suspended in growth medium in 96-  
461 well plates. The next day, appropriate concentrations of cinanserin were added to the  
462 medium. After 24 h, the relative numbers of surviving cells were measured by CCK8  
463 (Beyotime, China) assay in accordance with the manufacturer's instructions. All  
464 experiments were performed in triplicate.

465 **Plaque-reduction assay**

466  $1 \times 10^5$  Vero E6 cells were seeded in a 24-well plate and treated with different doses of the  
467 inhibitors. All the infection experiments were performed at BSL-3. Inhibitors with different  
468 dilution concentrations were mixed with COVID-19 virus (100 PFU), 200  $\mu$ l mixtures were  
469 inoculated onto monolayer Vero E6 cells for 1 h. After removing the supernatant, the plate  
470 was washed twice with DMEM medium, cells were incubated with 0.9% agarose  
471 containing appropriate concentrations of inhibitors. The overlay was discarded at 4 days  
472 p.i. and cells were fixed for 30 min in 4% polyoxymethylene and stained with crystal violet  
473 working solution. The plaque forming units were determined. All experiments were  
474 performed in four replicates.

475 **Intact protein analysis**

476 2.5  $\mu$ l of compounds (10 mM in DMSO) were added into 50  $\mu$ l of COVID-19 virus M<sup>pro</sup>  
477 (10 mg ml<sup>-1</sup>). The mixtures were kept in room temperature for 30 min. Liquid  
478 chromatography-mass spectrometry (LC-MS) analyses were performed in positive-ion  
479 mode with a quadrupole-time-of-flight (QTOF) mass spectrometer (Agilent 6550, USA)  
480 coupled with a high-performance liquid chromatograph (HPLC, Agilent 1260, USA) for  
481 detecting the molecular weight of intact proteins. The samples were eluted from a  
482 Phenomenex Jupiter C4 300Å LC Column (2×150 mm, 5  $\mu$ m) over a 15 min gradient from  
483 5% to 100% acetonitrile containing 0.1% formic acid at a flow rate of 0.5 ml/min. The  
484 acquisition method in positive-ion mode with Dual Agilent Jet Stream electrospray voltage  
485 used a capillary temperature of 250 °C, a fragmentor of 175 V, a capillary voltage of 3000  
486 V. Mass deconvolution was performed using Agilent MassHunter Qualitative Analysis  
487 B.06.00 software with BioConfirm Workflow.

488 **Tandem MS/MS analysis**

489 The samples were precipitated and redissolved by 8 M urea, and then digested for 16 h at  
490 25 °C by chymotrypsin at an enzyme-to-substrate ratio of 1:50 (w/w). The digested  
491 peptides were desalted and loaded onto a homemade 30 cm-long pulled-tip analytical  
492 column (ReproSil-Pur C18 AQ 1.9 µm particle size, Dr. Maisch GmbH, 75 µm ID× 360  
493 µm OD) connected to an Easy-nLC1200 UHPLC (Thermo Fisher Scientific, USA) for  
494 mass spectrometry analysis. The elution gradient and mobile phase constitution used for  
495 peptide separation were as follows: 0-1 min, 4%-8% B; 1-96 min, 8-35% B; 96-104 min,  
496 35-60% B; 105-120min, 60-100% B (mobile phase A: 0.1% formic acid in water; mobile  
497 phase B: 0.1% formic acid in 80% acetonitrile) at a flow rate of 300 nl /min. Peptides eluted  
498 from the LC column were directly electro-sprayed into the mass spectrometer with the  
499 application of a distal 1.8-kV spray voltage. Survey full-scan MS spectra (from m/z 300–  
500 1800) were acquired in the Orbitrap analyzer (Q Exactive, Thermo Fisher Scientific, USA)  
501 with resolution  $r = 70,000$  at m/z 400. The top 20 MS/MS events were sequentially  
502 generated and selected from the full MS spectrum at a 30% normalized collision energy.  
503 The dynamic exclusion time was set at 10 seconds. One acquisition cycle includes one full-  
504 scan MS spectrum followed by top 20 MS/MS events, sequentially generated on the first  
505 to the twentieth most intense ions selected from the full MS spectrum at a 28% normalized  
506 collision energy. The acquired MS/MS data were analyzed UniProtKB *E.coli* database  
507 (database released on Nov. 11, 2016) containing nsp5 using Protein Discoverer 2.1. In order  
508 to accurately estimate peptide probabilities and false discovery rates (FDR), we used a  
509 decoy database containing the reversed sequences of all the proteins appended to the target  
510 database. FDR was set at 0.01. Mass tolerance for precursor ions was set at 20 ppm.

511 Chymotrypsin was defined as cleavage enzyme and the maximal number of missed  
512 cleavage sites was set at 4. Protein N-terminus acetylation, methionine oxidation and  
513 compounds covalent bindings were set as variable modifications. The modified peptides  
514 were manually checked and labeled.

- 515 32 Anand, K., Ziebuhr, J., Wadhvani, P., Mesters, J. R. & Hilgenfeld, R. Coronavirus main proteinase  
516 (3CL(pro)) structure: Basis for design of anti-SARS drugs. *Science* **300**, 1763-1767,  
517 doi:10.1126/science.1085658 (2003).
- 518 33 Winter, G. xia2: an expert system for macromolecular crystallography data reduction. *Journal of*  
519 *applied crystallography* **43**, 186-190 (2010).
- 520 34 McCoy, A. J. *et al.* Phaser crystallographic software. *Journal of applied crystallography* **40**, 658-  
521 674 (2007).
- 522 35 Potterton, L. *et al.* CCP4i2: the new graphical user interface to the CCP4 program suite. *Acta*  
523 *Crystallographica Section D-Structural Biology* **74**, 68-84, doi:10.1107/s2059798317016035  
524 (2018).
- 525 36 Emsley, P., Lohkamp, B., Scott, W. G. & Cowtan, K. Features and development of Coot. *Acta*  
526 *Crystallographica Section D: Biological Crystallography* **66**, 486-501 (2010).
- 527 37 Afonine, P. V. *et al.* Towards automated crystallographic structure refinement with phenix.refine.  
528 *Acta Crystallographica Section D-Structural Biology* **68**, 352-367,  
529 doi:10.1107/s0907444912001308 (2012).
- 530 38 Friesner, R. A. *et al.* Glide: A new approach for rapid, accurate docking and scoring. 1. Method and  
531 assessment of docking accuracy. *Journal of Medicinal Chemistry* **47**, 1739-1749,  
532 doi:10.1021/jm0306430 (2004).
- 533 39 Greenwood, J. R., Calkins, D., Sullivan, A. P. & Shelley, J. C. Towards the comprehensive, rapid,  
534 and accurate prediction of the favorable tautomeric states of drug-like molecules in aqueous solution.  
535 *Journal of computer-aided molecular design* **24**, 591-604 (2010).
- 536 40 Bai, F. *et al.* Free energy landscape for the binding process of Huperzine A to acetylcholinesterase.  
537 *Proceedings of the National Academy of Sciences of the United States of America* **110**, 4273-4278,  
538 doi:10.1073/pnas.1301814110 (2013).
- 539 41 Liu, X. F., Jiang, H. L. & Li, H. L. SHAFTS: A Hybrid Approach for 3D Molecular Similarity  
540 Calculation. 1. Method and Assessment of Virtual Screening. *Journal of Chemical Information and*  
541 *Modeling* **51**, 2372-2385, doi:10.1021/ci200060s (2011).
- 542 42 Guimaraes, C. R. W. & Cardozo, M. MM-GB/SA rescoring of docking poses in structure-based lead  
543 optimization. *Journal of Chemical Information and Modeling* **48**, 958-970, doi:10.1021/ci800004w  
544 (2008).
- 545 43 Wang, M. *et al.* Remdesivir and chloroquine effectively inhibit the recently emerged novel  
546 coronavirus (2019-nCoV) in vitro. *Cell Research* **30**, 269-271, doi:10.1038/s41422-020-0282-0  
547 (2020).

548 **Acknowledgments** We would like to thank Ying Lei and Juan Kong from High Throughput  
549 Platform, staff from Analytical Chemistry Platform at Shanghai Institute for Advanced  
550 Immunochemical Studies, for their technical support. We are grateful to National Centre  
551 for Protein Science Shanghai and The Molecular and Cell Biology Core Facility of the  
552 School of Life Science and Technology, ShanghaiTech University for use of their  
553 instrumentation and technical assistance. We thank Prof. Zhijie Liu, and Haixia Su for  
554 discussion. We also thank the staff from beamlines BL17U1, BL18U1 and BL19U1 at



555 Shanghai Synchrotron Radiation Facility (China). This work was supported by grants from  
556 National Key R&D Program of China (grant No. 2017YFC0840300 to Z.R.), Project of  
557 International Cooperation and Exchanges NSFC (grant No. 81520108019 to Z.R.), Science  
558 and Technology Commission of Shanghai Municipality (grant No. 20431900200) and  
559 Department of Science and Technology of Guangxi Zhuang Autonomous Region (grant No.  
560 2020AB40007).

561 **Author contributions** Z.R. and H.Y. conceived the project; Z.J., H.J., Z.R., and H.Y.  
562 designed the experiments; Z.J., X.D., Y.D., J.Y., T.Y., Xiaoce Liu and Xiuna Yang cloned,  
563 expressed, purified and crystallized proteins; Z.J., Y.Z., B.Z. and F.L. collected the  
564 diffraction data; B.Z. and Xiang Liu solved the crystal structure; Z.J., X.D., Y.D. and J.Y.  
565 performed enzymatic activity and inhibition assay; L.W. and F.B. performed virtual  
566 screening and molecular docking; Y.X., L.Z. and H.L. performed enzymatic inhibition and  
567 cell-based antiviral assay for cinanserin; Y.D. and X. Li performed qRT-PCR analysis and  
568 cytotoxicity assay of N3; M.L., R.J. and Xinglou Yang performed plaque-reduction assay;  
569 C.P. performed intact protein and tandem MS/MS analyses; Z.J., X.D., Y.X., Y.D., C.P.,  
570 K.Y., F.B., H.L., Xiang Liu, L.G., W.X., G.X., C.Q., Z.S., H.J., Z.R. and H.Y. analyzed and  
571 discussed the data; Z.J., X.D., F.B., Xiang Liu, L.G., G.X., C.Q., Z.S., H.J., Z.R. and H.Y.  
572 wrote the manuscript.

573 **Competing interests** The authors declare no competing interests.

574 **Data and materials availability:** The PDB accession No. for the coordinates of COVID-  
575 19 virus M<sup>pro</sup> in complex with N3 is 6LU7 (Deposited: 2020-01-26; Released: 2020-02-  
576 05).

577

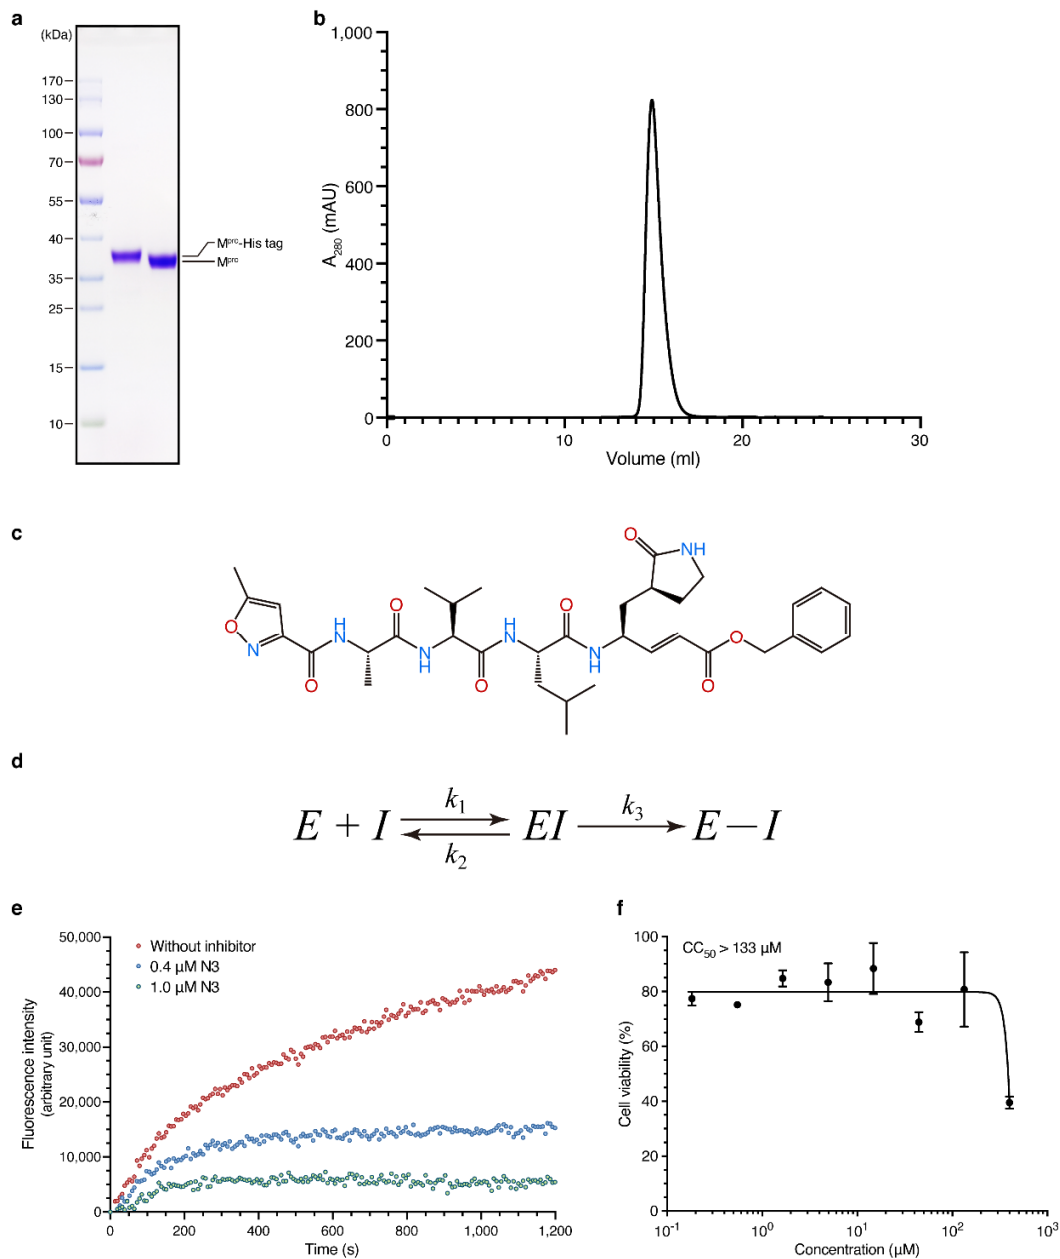

578

579 **Extended Data Fig. 1 | The purification of COVID-19 virus M<sup>pro</sup> and the inhibitory assay of**

580 **N3 compound. a**, The SDS-PAGE gel of COVID-19 virus M<sup>pro</sup>. The first lane: marker; the second

581 lane: M<sup>pro</sup> before treating with rhinovirus 3C protease; third lane: M<sup>pro</sup> after the cleavage of C-

582 terminal His tag. **b**, Size-exclusion chromatography profile of M<sup>pro</sup>. **c**, The chemical structure of

583 N3 inhibitor. **d**, Inhibition mechanism for N3. **e**, Typical inhibition curves for N3. **f**, Cytotoxicity

584 assay of N3 on Vero cells, data are shown as mean ± s.e.m., *n* = 3 technical replicates.

585

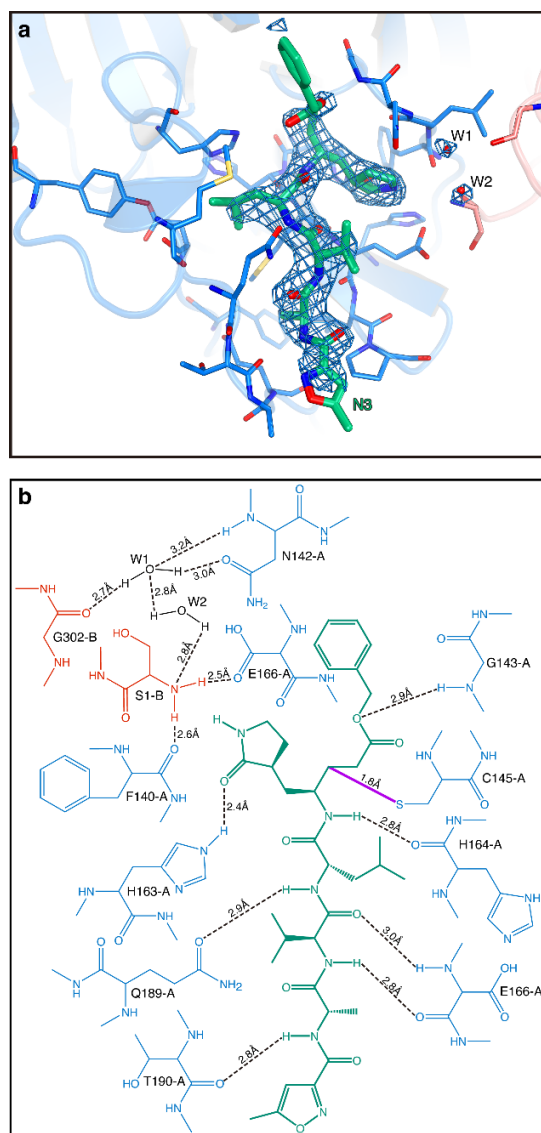

586

587 **Extended Data Fig. 2 | The interactions between COVID-19 virus M<sup>pro</sup> and N3.** **a**, The  $F_o-F_c$   
588 omit map (contour level = 3  $\sigma$ , shown as the blue mesh). **b**, Detailed view of the interactions  
589 between the inhibitor N3 and COVID-19 virus M<sup>pro</sup>. M<sup>pro</sup> residues are shown in blue (Protomer A)  
590 and salmon (Protomer B); N3 is in green, water is in black. The hydrogen bonds are shown as black  
591 dashed lines. The covalent bond between N3 and C145-A is in purple.

592

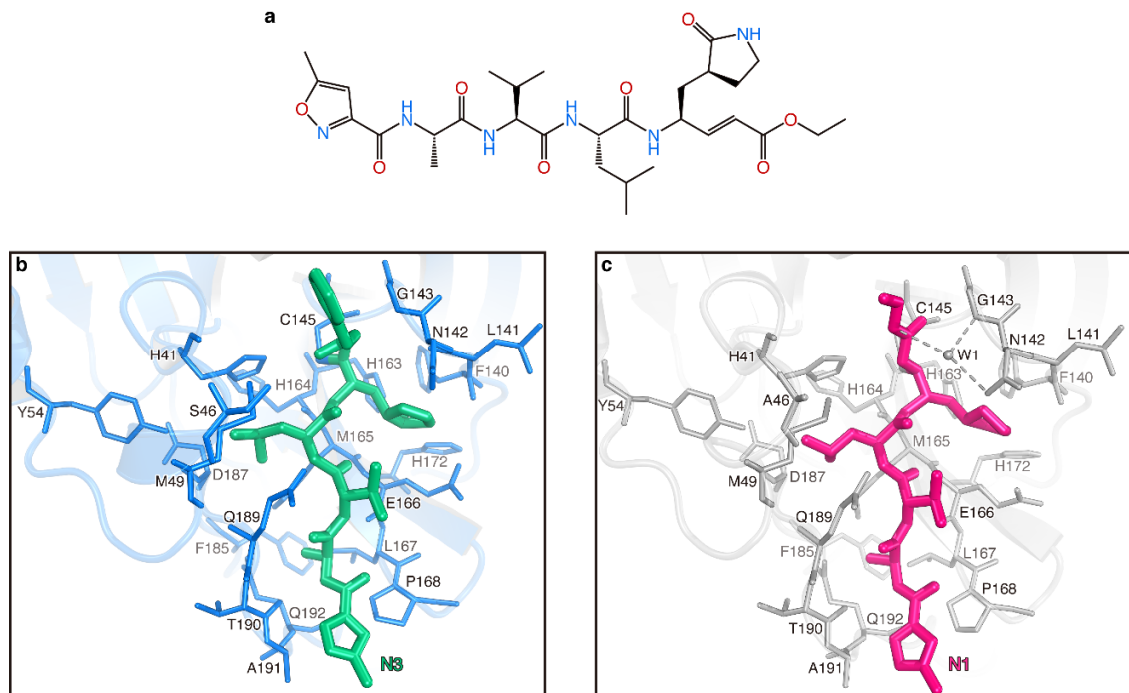

593

594 **Extended Data Fig. 3 | Comparison of the binding modes between COVID-19 virus M<sup>pro</sup>-N3**  
595 **and SARS-CoV M<sup>pro</sup>-N1. a**, The chemical structure of N1 inhibitor. **b**, The binding mode of  
596 COVID-19 virus M<sup>pro</sup> (blue sticks) with N3 (green sticks). **c**, The binding mode of SARS-CoV M<sup>pro</sup>  
597 (grey sticks) with N1 (pink sticks). The hydrogen bonds formed by water (W1) are indicated by the  
598 dashed lines.

599

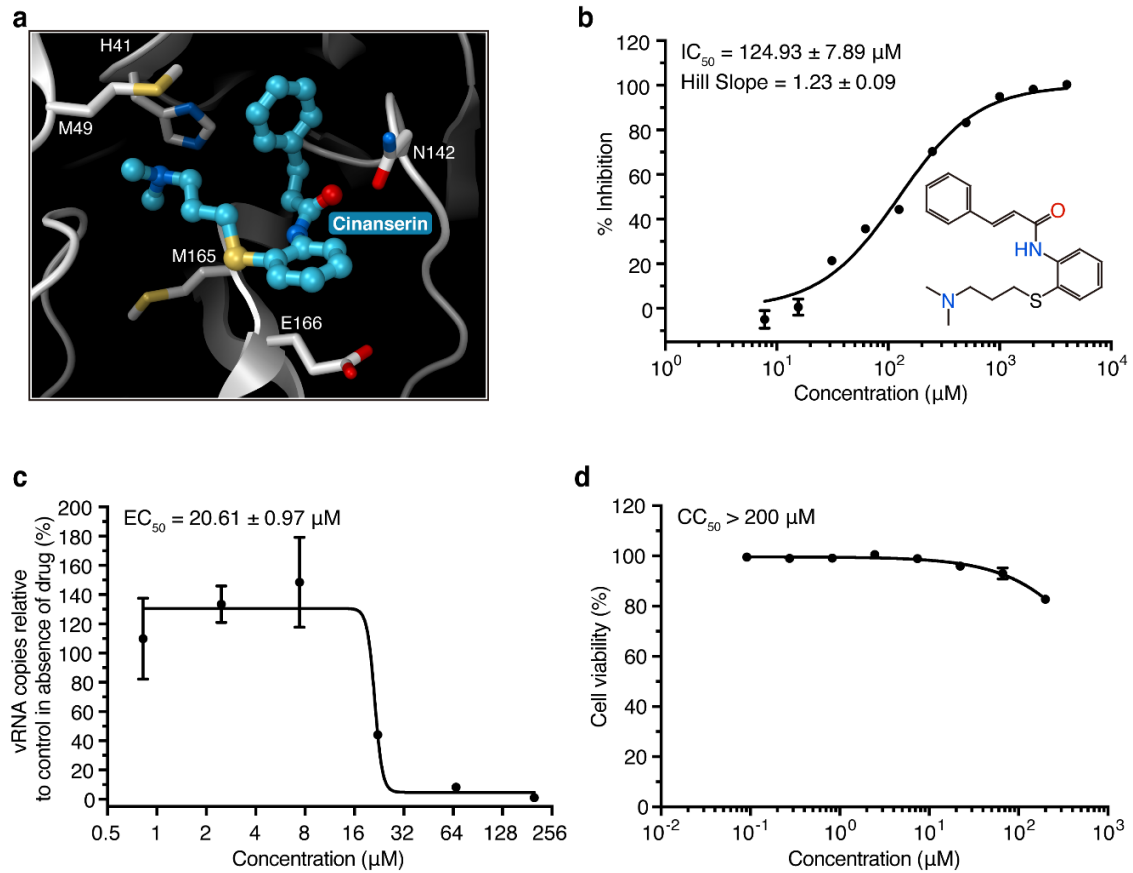

600

601 **Extended Data Fig. 4 | Cinanserin is an inhibitor for COVID-19 virus M<sup>Pro</sup>.** **a**, The docking  
602 result of cinanserin. The structure of COVID-19 virus M<sup>Pro</sup> is shown as a white cartoon, cinanserin  
603 is shown as cyan balls and sticks, residues predicted to be interacting with cinanserin are shown as  
604 sticks. **b**, Inhibitory activity of cinanserin on M<sup>Pro</sup>. **c**, Antiviral activity of cinanserin determined by  
605 qRT-PCR. **d**, Cytotoxicity assay of cinanserin on Vero E6 cells. All data are shown as mean  
606 ± s.e.m., *n* = 3 technical replicates.

607

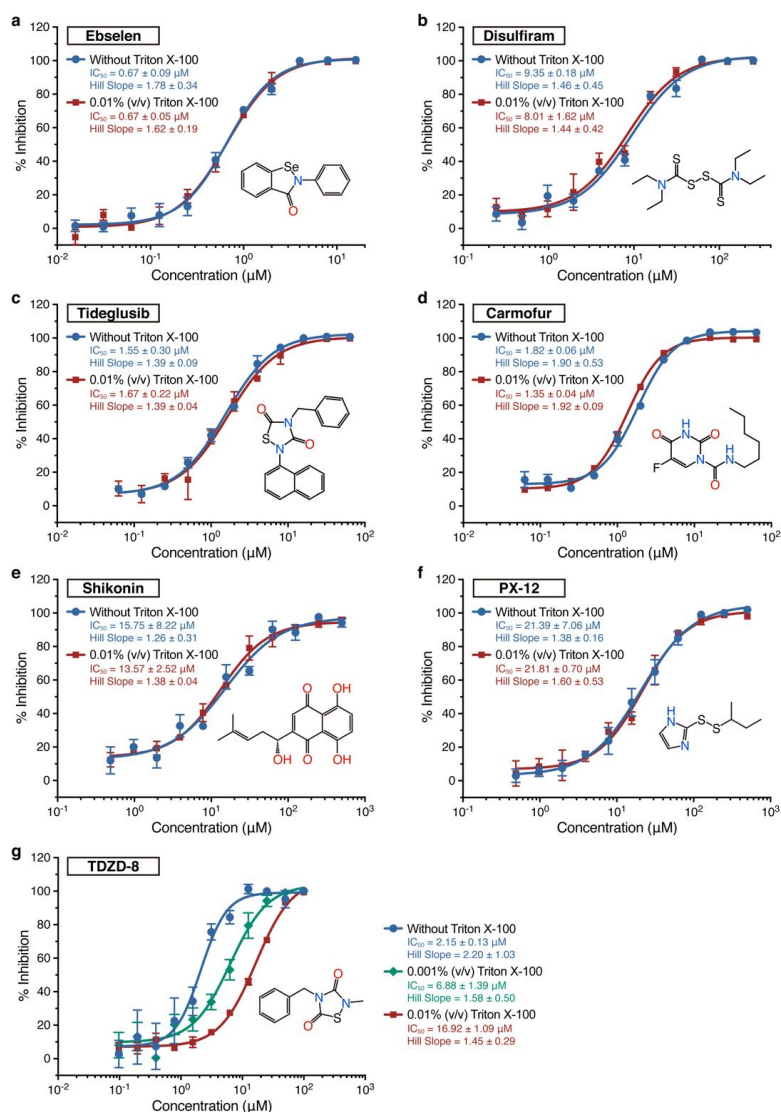

608

609 **Extended Data Fig. 5 | The detergent-based assay for drug leads. a-f,** The  $IC_{50}$  values  
 610 determined by in the presence or absence of 0.01% Triton X-100, which showed that detergent did  
 611 not affect the results. **g,** Different concentrations of Triton X-100 notably affected  $IC_{50}$  curves for  
 612 TDZD-8. All data are shown as mean  $\pm$  s.e.m.,  $n = 3$  technical replicates.

613

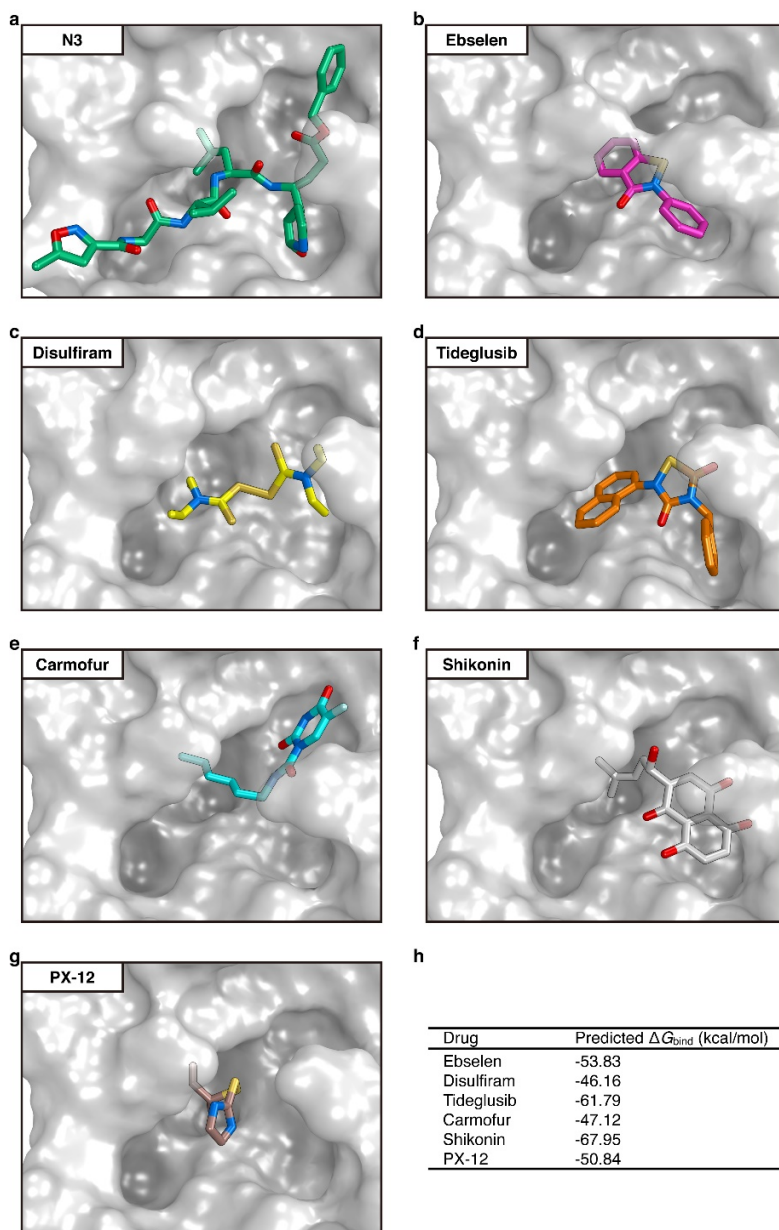

614

615 **Extended Data Fig. 6 | Docking Poses of different COVID-19 virus  $M^{\text{pro}}$  inhibitors.** **a**, The  
616 crystal structure of COVID-19 virus  $M^{\text{pro}}$ -N3 complex. **b-g**, The docking results of six drug leads.  
617  $M^{\text{pro}}$  is shown as grey background, inhibitors are in different colors. The inhibitors identified  
618 through the high-throughput screening are likely to occupy the same pocket as N3. **h**, Predicted  
619 binding affinities for the drug leads to COVID-19 virus  $M^{\text{pro}}$  by using MM-GBSA module  
620 integrated in Schrödinger.

621

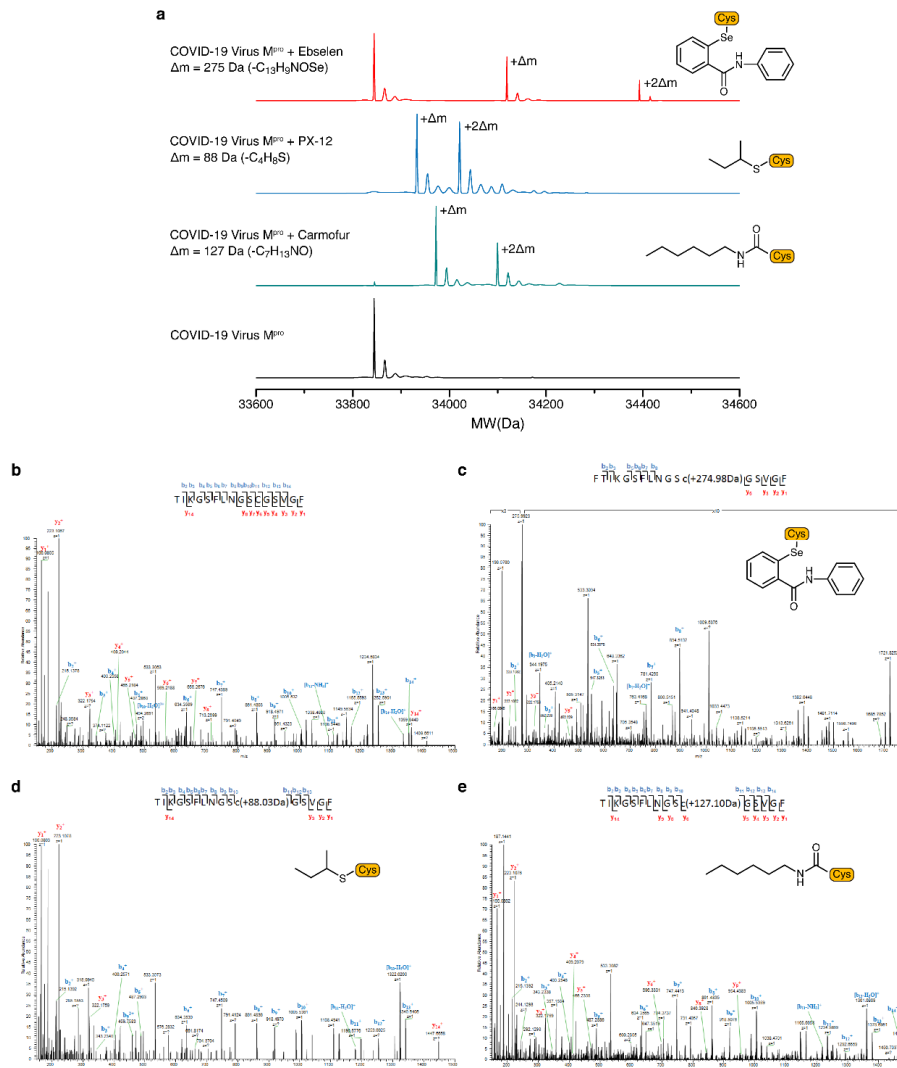

622

623 **Extended Data Fig. 7 | Tandem MS/MS analysis reveals that ebselen, PX-12 and carmofur are**  
 624 **able to covalently bind to C145 of COVID-19 virus  $M^{PrO}$ .** **a**, Molecular weight of apo COVID-  
 625 19 virus  $M^{PrO}$  and compounds treated  $M^{PrO}$ . The mass shifts ( $\Delta m$ ) of the proteins indicate that more  
 626 than one molecular of the compounds can be covalently bonded to one molecular of  $M^{PrO}$ . **b-e**, A  
 627 higher-energy collisional dissociation (HCD) MS/MS spectrum recorded on the  $[M+H]^{2+}$  ion **b**, at  
 628  $m/z$  787.3852 of the  $M^{PrO}$  unmodified peptide TIKGSFLNGSGSVGF, **c**, at  $m/z$  998.4152 of the  
 629  $M^{PrO}$  modified peptide FTIKGSFLNGSGSVGF harboring a modification ( $-C_{13}H_9NOSe$ ) induced  
 630 by ebselen on C145, **d**, at  $m/z$  831.4080 of the  $M^{PrO}$  modified peptide TIKGSFLNGSGSVGF  
 631 harboring a modification ( $-C_4H_8S$ ) induced by PX-12 on C145, **e**, at  $m/z$  850.9414 of the  $M^{PrO}$   
 632 modified peptide TIKGSFLNGSGSVGF harboring a modification ( $-C_7H_{13}NO$ ) induced by  
 633 carmofur on C145. Predicted b- and y-type ions (not including all) are listed above and below the  
 634 peptide sequence, respectively.



**Extended Data Table 1 | Data collection and refinement statistics**

| PDB code: 6LU7                                      |                         |
|-----------------------------------------------------|-------------------------|
| <b>Data collection</b>                              |                         |
| Space group                                         | <i>C</i> 2              |
| Cell dimensions                                     |                         |
| <i>a</i> , <i>b</i> , <i>c</i> (Å)                  | 97.931, 79.477, 51.803  |
| $\alpha$ , $\beta$ , $\gamma$ (°)                   | 90, 114.55, 90          |
| Resolution (Å)                                      | 50.00-2.16 (2.22-2.16)* |
| <i>R</i> <sub>merge</sub>                           | 18.9 (147.2)            |
| <i>I</i> / $\sigma$ <i>I</i>                        | 6.3 (3.2)               |
| Completeness (%)                                    | 100.0 (100.0)           |
| Redundancy                                          | 6.6 (6.1)               |
| <b>Refinement</b>                                   |                         |
| Resolution (Å)                                      | 50.00-2.16              |
| No. reflections                                     | 19455 (1431)            |
| <i>R</i> <sub>work</sub> / <i>R</i> <sub>free</sub> | 0.2020/0.2350           |
| No. atoms                                           |                         |
| Protein                                             | 2367                    |
| Ligand/ion                                          | 49                      |
| Water                                               | 84                      |
| <i>B</i> -factors                                   |                         |
| Protein                                             | 42.7                    |
| Ligand/ion                                          | 46.3                    |
| Water                                               | 44.2                    |
| R.m.s. deviations                                   |                         |
| Bond lengths (Å)                                    | 0.002                   |
| Bond angles (°)                                     | 0.474                   |

\*Values in parentheses are for highest-resolution shell.
